# Supplementary material
Source: PubMed Central journal article supplement (PMC3910714)

**The Sensititre® MYCOTB MIC plate for susceptibility testing of *Mycobacterium tuberculosis* to 1<sup>st</sup> and 2<sup>nd</sup> line drugs**

**SUPPLEMENTAL MATERIAL**

**Contents**

Table S1. Results for testing of 99 *M. tuberculosis* isolates from the Republic of Korea using the Sensititre MYCOTB MIC and agar proportions methods

Table S2. Results for testing of 98 *M. tuberculosis* isolates from Uganda using the Sensititre MYCOTB MIC and agar proportions methods

Table S3. Results for testing of 25 *M. tuberculosis* isolates from the Supranational Laboratory using the Sensititre MYCOTB MIC and agar proportions methods

Table S4. Sensititre® MYCOTB MIC plate drug concentrations that optimize sensitivity and specificity using APM as the reference comparator. Recommended critical concentrations for use in the liquid Mycobacterial Growth Indicator Tube (MGIT) system are also shown.

Figure S1. Receiver operator characteristic (ROC) curves for each tested drug.

Table S1. Results for testing of 99 *M. tuberculosis* isolates from the Republic of Korea using the Sensititre MYCOTB MIC and agar proportions methods

| Drug         | APM critical concentration (ug/ml) | MYCOTB result | # of isolates Resistant on APM | # of isolates Susceptible on APM | Sensitivity % (95% CI) | Specificity % (95% CI) | % Agreement-Categorical | % Agreement-Conditional |
|--------------|------------------------------------|---------------|--------------------------------|----------------------------------|------------------------|------------------------|-------------------------|-------------------------|
| Isoniazid    | 0.2                                | Resistant     | 73                             | 0                                | 100.0                  | 100.0                  | 100.0                   | 99.0                    |
|              |                                    | Susceptible   | 0                              | 26                               | (100 , 100)            | (100 , 100)            |                         |                         |
| Isoniazid    | 1                                  | Resistant     | 51                             | 1                                | 81.0                   | 97.2                   | 86.9                    | 99.0                    |
|              |                                    | Susceptible   | 12                             | 35                               | (71.3 , 90.7)          | (91.9 , 102.6)         |                         |                         |
| Rifampin     | 1                                  | Resistant     | 74                             | 0                                | 98.7                   | 100.0                  | 99.0                    | 100.0                   |
|              |                                    | Susceptible   | 1                              | 24                               | (96.1 , 101.3)         | (100 , 100)            |                         |                         |
| Rifabutin    | 0.5                                | Resistant     | 52                             | 13                               | 100.0                  | 72.3                   | 86.9                    | 93.9                    |
|              |                                    | Susceptible   | 0                              | 34                               | (100 , 100)            | (59.6 , 85.1)          |                         |                         |
| Ethambutol   | 5                                  | Resistant     | 49                             | 0                                | 58.3                   | 100.0                  | 64.7                    | 83.8                    |
|              |                                    | Susceptible   | 35                             | 15                               | (47.8 , 68.9)          | (100 , 100)            |                         |                         |
| Ethambutol   | 10                                 | Resistant     | 12                             | 1                                | 23.1                   | 97.9                   | 58.6                    | 83.8                    |
|              |                                    | Susceptible   | 40                             | 46                               | (11.6 , 34.5)          | (93.8 , 102)           |                         |                         |
| Ofloxacin    | 2                                  | Resistant     | 52                             | 11                               | 100.0                  | 76.6                   | 88.9                    | 95.0                    |
|              |                                    | Susceptible   | 0                              | 36                               | (100 , 100)            | (64.5 , 88.7)          |                         |                         |
| Moxifloxacin | 0.5                                | Resistant     | 45                             | 30                               | 100.0                  | 44.4                   | 69.7                    | 81.8                    |
|              |                                    | Susceptible   | 0                              | 24                               | (100 , 100)            | (31.19 , 57.7)         |                         |                         |

|              |    |             |    |    |                |                |      |      |
|--------------|----|-------------|----|----|----------------|----------------|------|------|
| Moxifloxacin | 2  | Resistant   | 19 | 36 | 100.0          | 55.0           | 63.6 | 76.8 |
|              |    | Susceptible | 0  | 44 | (100 , 100)    | (44.1 , 65.9)  |      |      |
| Streptomycin | 2  | Resistant   | 26 | 21 | 96.3           | 70.8           | 77.8 | 98.0 |
|              |    | Susceptible | 1  | 51 | (89.2 , 103.4) | (60.3 , 81.3)  |      |      |
| Streptomycin | 10 | Resistant   | 20 | 2  | 90.9           | 97.4           | 96.0 | 97.0 |
|              |    | Susceptible | 2  | 75 | (78.9 , 103.0) | (93.9 , 101.0) |      |      |
| Amikacin     | 4  | Resistant   | 45 | 0  | 95.7           | 100.0          | 98.0 | 99.0 |
|              |    | Susceptible | 2  | 52 | (90.0 , 101.6) | (100 , 100)    |      |      |
| Kanamycin    | 5  | Resistant   | 51 | 0  | 96.2           | 100.0          | 98.0 | 99.0 |
|              |    | Susceptible | 2  | 46 | (91.1 , 101.4) | (100 , 100)    |      |      |
| Cycloserine  | 25 | Resistant   | 2  | 7  | 10.0           | 91.1           | 74.8 | 90.9 |
|              |    | Susceptible | 18 | 72 | (-3.2 , 23.2)  | (84.9 , 97.4)  |      |      |
| Ethionamide  | 5  | Resistant   | 54 | 3  | 87.1           | 91.9           | 88.9 | 98.0 |
|              |    | Susceptible | 8  | 34 | (78.8 , 95.4)  | (83.1 , 100.7) |      |      |
| PAS          | 2  | Resistant   | 57 | 6  | 89.1           | 82.9           | 86.9 | 96.0 |
|              |    | Susceptible | 7  | 29 | (81.4 , 96.7)  | (70.4 , 95.3)  |      |      |

Abbreviations: APM, agar proportion method; CI, confidence interval; PAS, para-aminosalicylic acid



|              |    |             |    |    |                |                |       |       |
|--------------|----|-------------|----|----|----------------|----------------|-------|-------|
| Moxifloxacin | 2  | Resistant   | 0  | 0  | 0.0            | 100.0          | 100.0 | 100.0 |
|              |    | Susceptible | 0  | 98 |                | (100 , 100)    |       |       |
| Streptomycin | 2  | Resistant   | 10 | 5  | 100.0          | 94.3           | 94.9  | 98.0  |
|              |    | Susceptible | 0  | 83 | (100 , 100)    | (89.5 , 99.2)  |       |       |
| Streptomycin | 10 | Resistant   | 5  | 3  | 83.3           | 96.7           | 95.9  | 99.0  |
|              |    | Susceptible | 1  | 89 | (53.5 , 113.2) | (93.1 , 100.4) |       |       |
| Amikacin     | 4  | Resistant   | 0  | 0  | 0.0            | 100.0          | 100.0 | 100.0 |
|              |    | Susceptible | 0  | 98 |                | (100 , 100)    |       |       |
| Kanamycin    | 5  | Resistant   | 0  | 0  | 0.0            | 100.0          | 100.0 | 100.0 |
|              |    | Susceptible | 0  | 98 |                | (100 , 100)    |       |       |
| Cycloserine  | 25 | Resistant   | 1  | 8  | 100.0          | 91.8           | 91.8  | 100.0 |
|              |    | Susceptible | 0  | 89 | (100 , 100)    | (86.3, 97.2)   |       |       |
| Ethionamide  | 5  | Resistant   | 11 | 2  | 55.0           | 97.4           | 88.8  | 99.0  |
|              |    | Susceptible | 9  | 76 | (33.2 , 76.8)  | (93.9 , 100.9) |       |       |
| PAS          | 2  | Resistant   | 1  | 1  | 100.0          | 98.97          | 99.0  | 100.0 |
|              |    | Susceptible | 0  | 96 | (100 , 100)    | (97.0 , 101.0) |       |       |

Abbreviations: APM, agar proportion method; CI, confidence interval; PAS, para-aminosalicylic acid

| Table S3. Results for testing of 25 <i>M. tuberculosis</i> isolates from the Supranational Laboratory using the Sensititre MYCOTB MIC and agar proportions methods |                                    |               |                                |                                  |                        |                        |                         |                         |
|--------------------------------------------------------------------------------------------------------------------------------------------------------------------|------------------------------------|---------------|--------------------------------|----------------------------------|------------------------|------------------------|-------------------------|-------------------------|
| Drug                                                                                                                                                               | APM critical concentration (ug/ml) | MYCOTB result | # of isolates Resistant on APM | # of isolates Susceptible on APM | Sensitivity % (95% CI) | Specificity % (95% CI) | % Agreement-Categorical | % Agreement-Conditional |
| Isoniazid                                                                                                                                                          | 0.2                                | Resistant     | 16                             | 0                                | 100.0                  | 100.0                  | 100.0                   | 100.0                   |
|                                                                                                                                                                    |                                    | Susceptible   | 0                              | 9                                | (100 , 100)            | (100 , 100)            |                         |                         |
| Isoniazid                                                                                                                                                          | 1                                  | Resistant     | 14                             | 0                                | 93.3                   | 100.0                  | 96.0                    | 100.0                   |
|                                                                                                                                                                    |                                    | Susceptible   | 1                              | 10                               | (80.7 , 106.0)         | (100 , 100)            |                         |                         |
| Rifampin                                                                                                                                                           | 1                                  | Resistant     | 16                             | 0                                | 100.0                  | 100.0                  | 100.0                   | 100.0                   |
|                                                                                                                                                                    |                                    | Susceptible   | 0                              | 9                                | (100 , 100)            | (100 , 100)            |                         |                         |
| Rifabutin                                                                                                                                                          | 0.5                                | Resistant     | 12                             | 1                                | 100.0                  | 92.3                   | 96.0                    | 96.0                    |
|                                                                                                                                                                    |                                    | Susceptible   | 0                              | 12                               | (100 , 100)            | (77.8 , 106.8)         |                         |                         |
| Ethambutol                                                                                                                                                         | 5                                  | Resistant     | 3                              | 2                                | 75.0                   | 90.5                   | 88.0                    | 100.0                   |
|                                                                                                                                                                    |                                    | Susceptible   | 1                              | 19                               | (32.6 , 117.4)         | (77.9 , 103.0)         |                         |                         |
| Ethambutol                                                                                                                                                         | 10                                 | Resistant     | 1                              | 1                                | 100.0                  | 95.8                   | 96.0                    | 100.0                   |
|                                                                                                                                                                    |                                    | Susceptible   | 0                              | 23                               | (100 , 100)            | (87.8 , 103.8)         |                         |                         |
| Ofloxacin                                                                                                                                                          | 2                                  | Resistant     | 10                             | 1                                | 100.0                  | 93.3                   | 96.0                    | 100.0                   |
|                                                                                                                                                                    |                                    | Susceptible   | 0                              | 14                               | (100 , 100)            | (80.7 , 106.0)         |                         |                         |
| Moxifloxacin                                                                                                                                                       | 0.5                                | Resistant     | 10                             | 3                                | 100.0                  | 80.0                   | 88.0                    | 100.0                   |
|                                                                                                                                                                    |                                    | Susceptible   | 0                              | 12                               | (100 , 100)            | (59.8 , 100.2)         |                         |                         |

|              |    |             |   |    |                |                |       |        |
|--------------|----|-------------|---|----|----------------|----------------|-------|--------|
| Moxifloxacin | 2  | Resistant   | 4 | 1  | 80.0           | 95.0           | 92.0  | 100.0  |
|              |    | Susceptible | 1 | 19 | (44.9 , 115.1) | (85.5 , 104.6) |       |        |
| Streptomycin | 2  | Resistant   | 9 | 2  | 100.0          | 87.5           | 92.0  | 100.0  |
|              |    | Susceptible | 0 | 14 | (100 , 100)    | (71.3 , 103.7) |       |        |
| Streptomycin | 10 | Resistant   | 9 | 0  | 100.0          | 100.0          | 100.0 | 100.0  |
|              |    | Susceptible | 0 | 16 | (100 , 100)    | (100 , 100)    |       |        |
| Amikacin     | 4  | Resistant   | 7 | 0  | 100.0          | 100.0          | 100.0 | 100.0  |
|              |    | Susceptible | 0 | 18 | (100 , 100)    | (100 , 100)    |       |        |
| Kanamycin    | 5  | Resistant   | 9 | 2  | 100.0          | 87.5           | 92.0  | 100.00 |
|              |    | Susceptible | 0 | 14 | (100 , 100)    | (71.3 , 103.7) |       |        |
| Cycloserine  | 25 | Resistant   | 1 | 7  | 100.0          | 70.8           | 72.0  | 100.0  |
|              |    | Susceptible | 0 | 17 | (100 , 100)    | (52.7 , 89.0)  |       |        |
| Ethionamide  | 5  | Resistant   | 3 | 1  | 100.0          | 95.4           | 96.0  | 100.0  |
|              |    | Susceptible | 0 | 21 | (100 , 100)    | (86.8 , 104.2) |       |        |
| PAS          | 2  | Resistant   | 0 | 0  | 0.0            | 100.0          | 100.0 | 100.0  |
|              |    | Susceptible | 0 | 25 |                | (100 , 100)    |       |        |

Abbreviations: APM, agar proportion method; CI, confidence interval; PAS, para-aminosalicylic acid

Table S4. Sensititre® MYCOTB MIC plate drug concentrations that optimize sensitivity and specificity using APM as the reference comparator. Recommended critical concentrations for use in the liquid MGIT system are also shown.

| Drug         | APM critical concentration (ug/ml) | Optimal MYCOTB plate concentration(s) (ug/ml) | Area under the Receiver Operator Characteristic curve | Recommended MGIT critical concentration (ug/ml)* |
|--------------|------------------------------------|-----------------------------------------------|-------------------------------------------------------|--------------------------------------------------|
| Isoniazid    | 0.2                                | 0.12-0.25                                     | 1.00                                                  | 0.1                                              |
| Isoniazid    | 1                                  | 0.5                                           | 0.98                                                  |                                                  |
| Rifampin     | 1                                  | 0.5-1                                         | 1.00                                                  | 1                                                |
| Rifabutin    | 0.5                                | 0.5-1                                         | 0.96                                                  | 0.5                                              |
| Ethambutol   | 5                                  | 2                                             | 0.88                                                  | 5                                                |
| Ethambutol   | 10                                 | 2-4                                           | 0.85                                                  |                                                  |
| Ofloxacin    | 2                                  | 4                                             | 0.99                                                  | 2                                                |
| Moxifloxacin | 0.5                                | 1                                             | 0.95                                                  | 0.25                                             |
| Moxifloxacin | 2                                  | 2                                             | 0.94                                                  |                                                  |
| Streptomycin | 2                                  | 2-4                                           | 0.98                                                  | 1                                                |
| Streptomycin | 10                                 | 4                                             | 0.99                                                  |                                                  |
| Amikacin     | 4                                  | 1-2                                           | 1.00                                                  | 1                                                |
| Kanamycin    | 5                                  | 5                                             | 0.98                                                  | 2.5                                              |
| Cycloserine  | 25                                 | Unable to assess                              | 0.56                                                  | Not recommended                                  |
| Ethionamide  | 5                                  | 1.2-2.5                                       | 0.96                                                  | 5                                                |
| PAS          | 2                                  | 2                                             | 0.96                                                  | 4                                                |

**\*Clinical Laboratory Standards Institute.** Susceptibility testing of mycobacteria, nocardia, and other aerobic actinomycetes: approved standard. CLSI document M24-A (ISBN 1-56238-550-3). Clinical Laboratory Standards Institute, Wayne, PA, 2003.  
Abbreviations: APM, agar proportion method; MGIT, Mycobacterial Growth Indicator Tube; PAS, para-aminosalicylic acid



Figure S1. Receiver operator characteristic (ROC) curves for each tested drug.

Numbers in bold are MYCO TB plate minimum inhibitory concentrations.

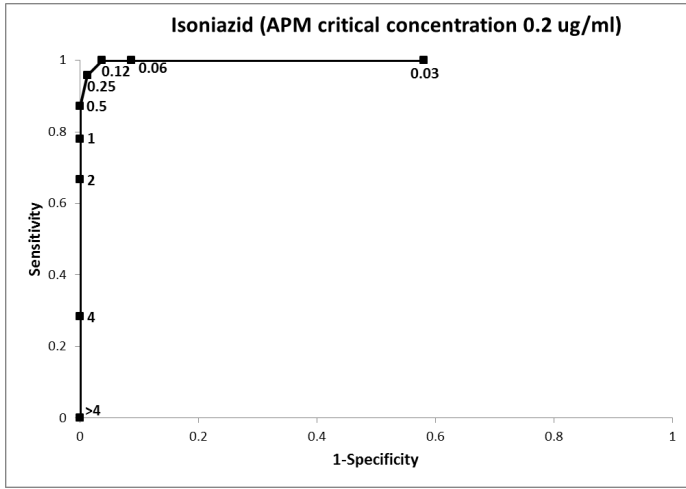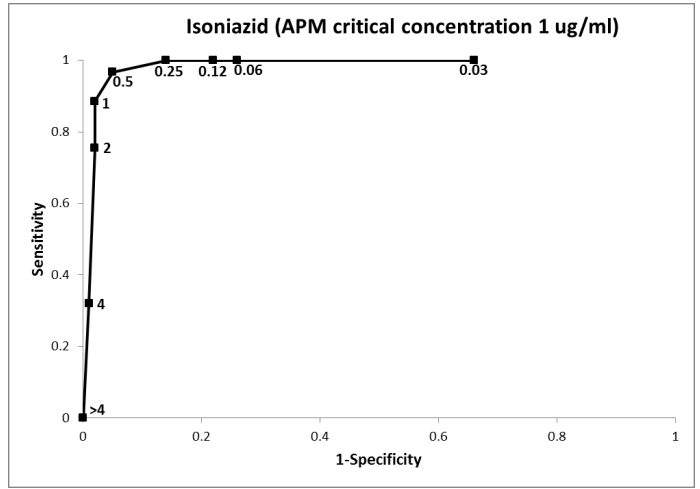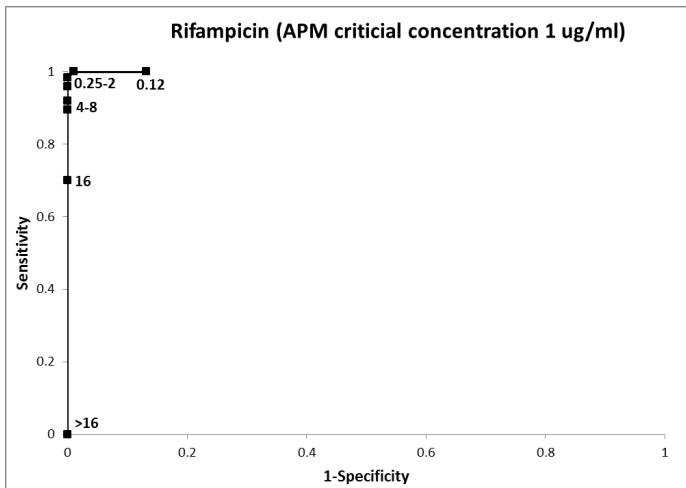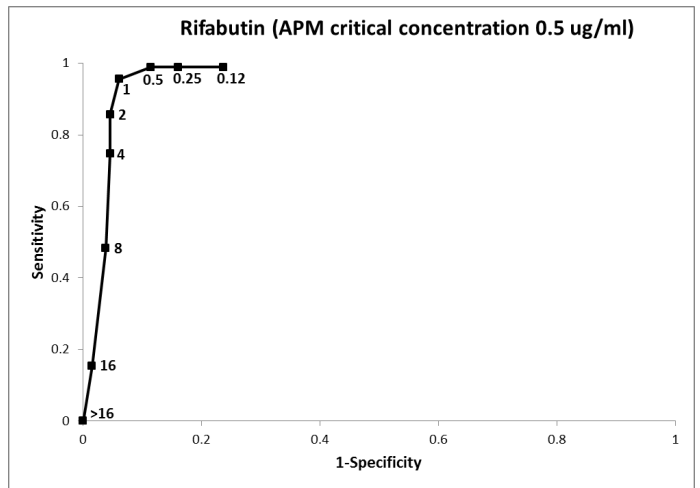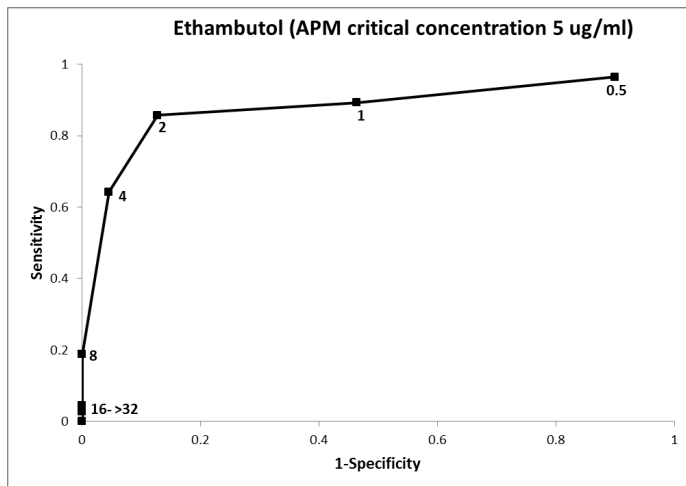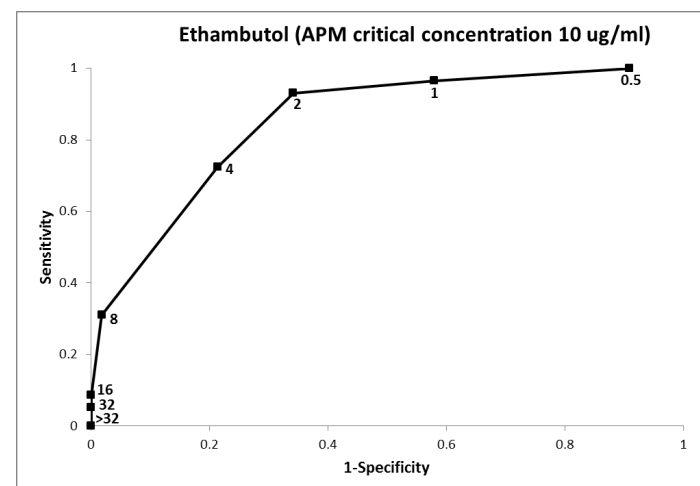

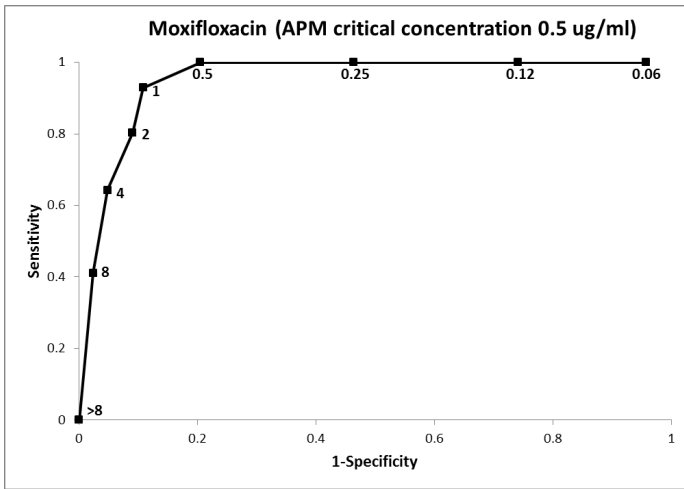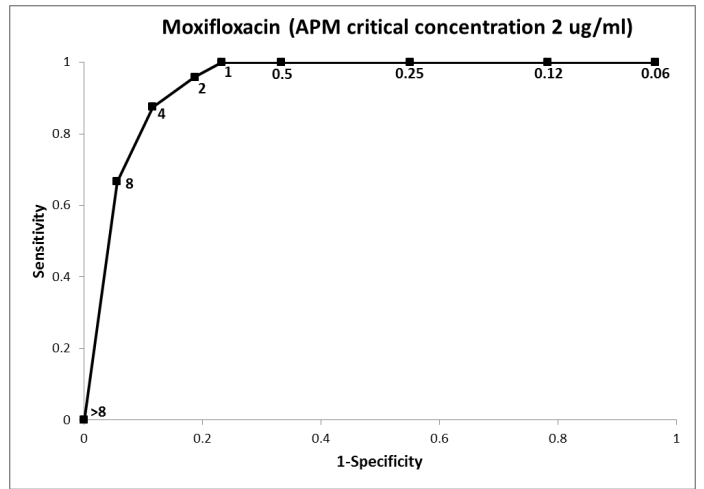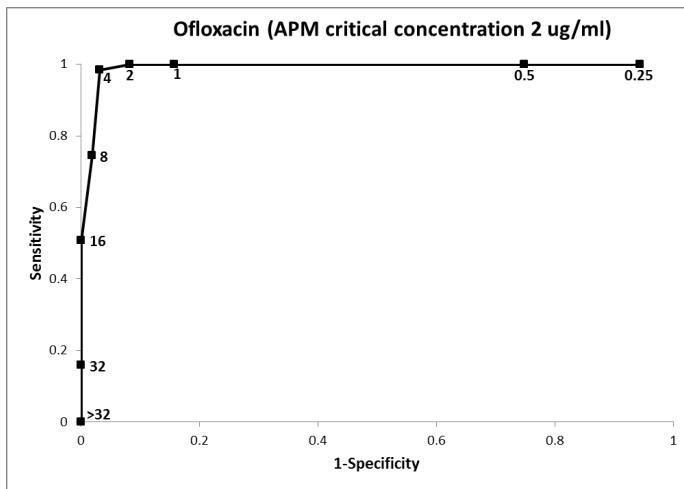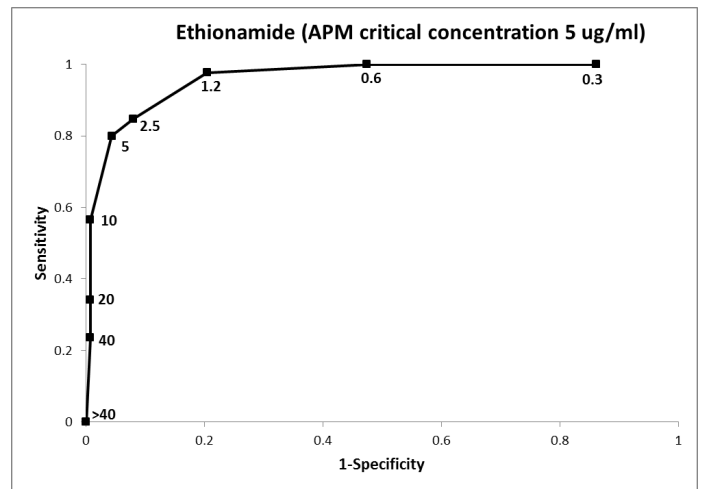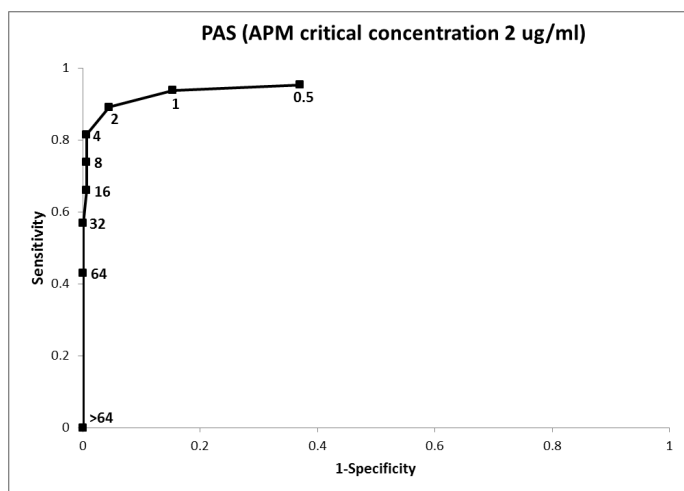

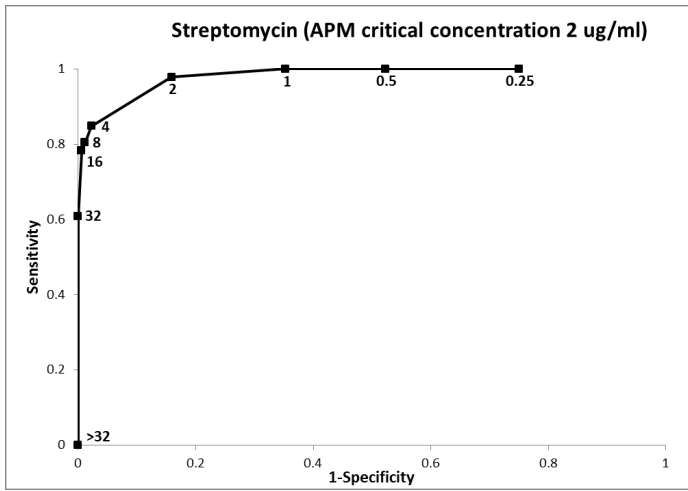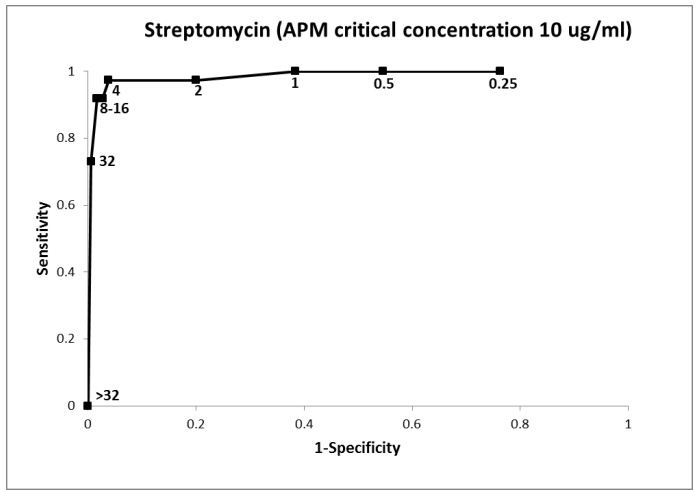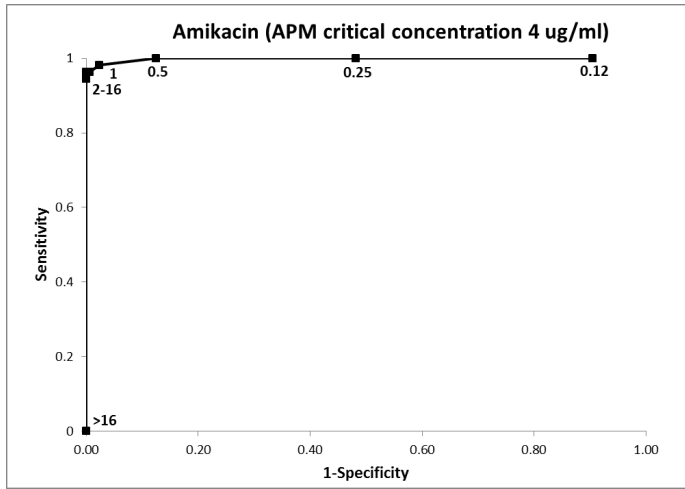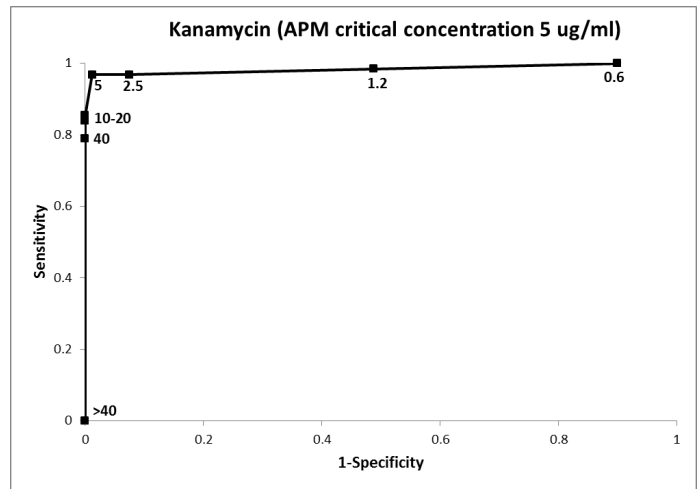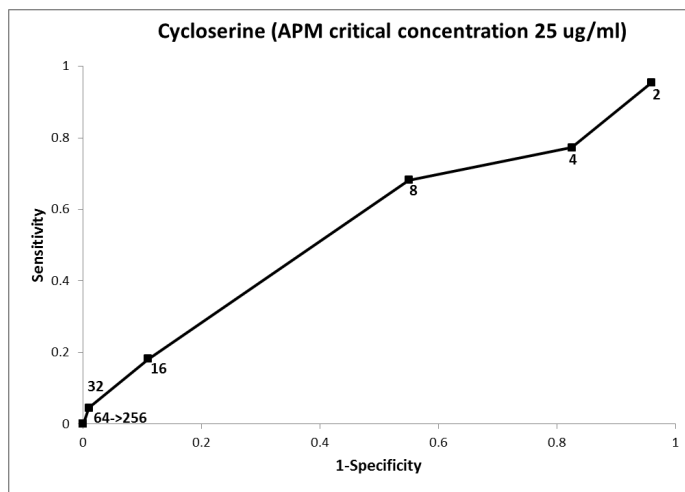

Supplement: AAC.01209-13_zac012132417so1.pdf [file AAC.01209-13_zac012132417so1.pdf]
